# Supplementary material for: Lateral Root Initiation in Cucumber (Cucumis sativus): What Does the Expression Pattern of Rapid Alkalinization Factor 34 (RALF34) Tell Us?
Source: MDPI journal article supplement (doi:10.3390/ijms24098440), 2023-05-08
Supplement: s1 [file s1]

## Supplementary Materials

### **Lateral Root Initiation in Cucumber (*Cucumis sativus*): What Does the Expression Pattern of *Rapid Alkalinization Factor 34 (RALF34)* Tell Us?**

Alexey S. Kiryushkin, Elena L. Ilina, Elizaveta D. Guseva, Katharina Pawlowski and Kirill N. Demchenko

The following Supplementary Materials are available for this article:

**Figure S1:** Alignment and sequence logo of the RALF34 protein precursors across the Cucurbitales order compared with Arabidopsis;

**Figure S2:** Expression of the *RALF* genes in different cucumber organs;

**Figure S3:** Localization of RALF34 fusion protein in *Cucumis sativus* root tips;

**Figure S4:** Map of pKGW-DR-MGW binary vector;

**Table S1:** Information about Cucurbitales RALF34 sequences used in alignment for sequence logo building (Excel file).

**Table S2:** Construction of binary vectors; **Table S3:** Construction of entry and intermediate vectors;

**Table S4:** List of primers used for amplification of promoters/coding regions in this study;

**Table S5:** Combination of primers, used for different cloning steps;

**Table S6:** List of RT-qPCR primers used in this study;

**Video S1:** 3D movie of initiating lateral root primordium in *Cucumis sativus* root (*DR5::mRuby-H2B*). (AVI file).

subtilase  
cleavage  
site, RRSL

RALF34  
mature  
peptide

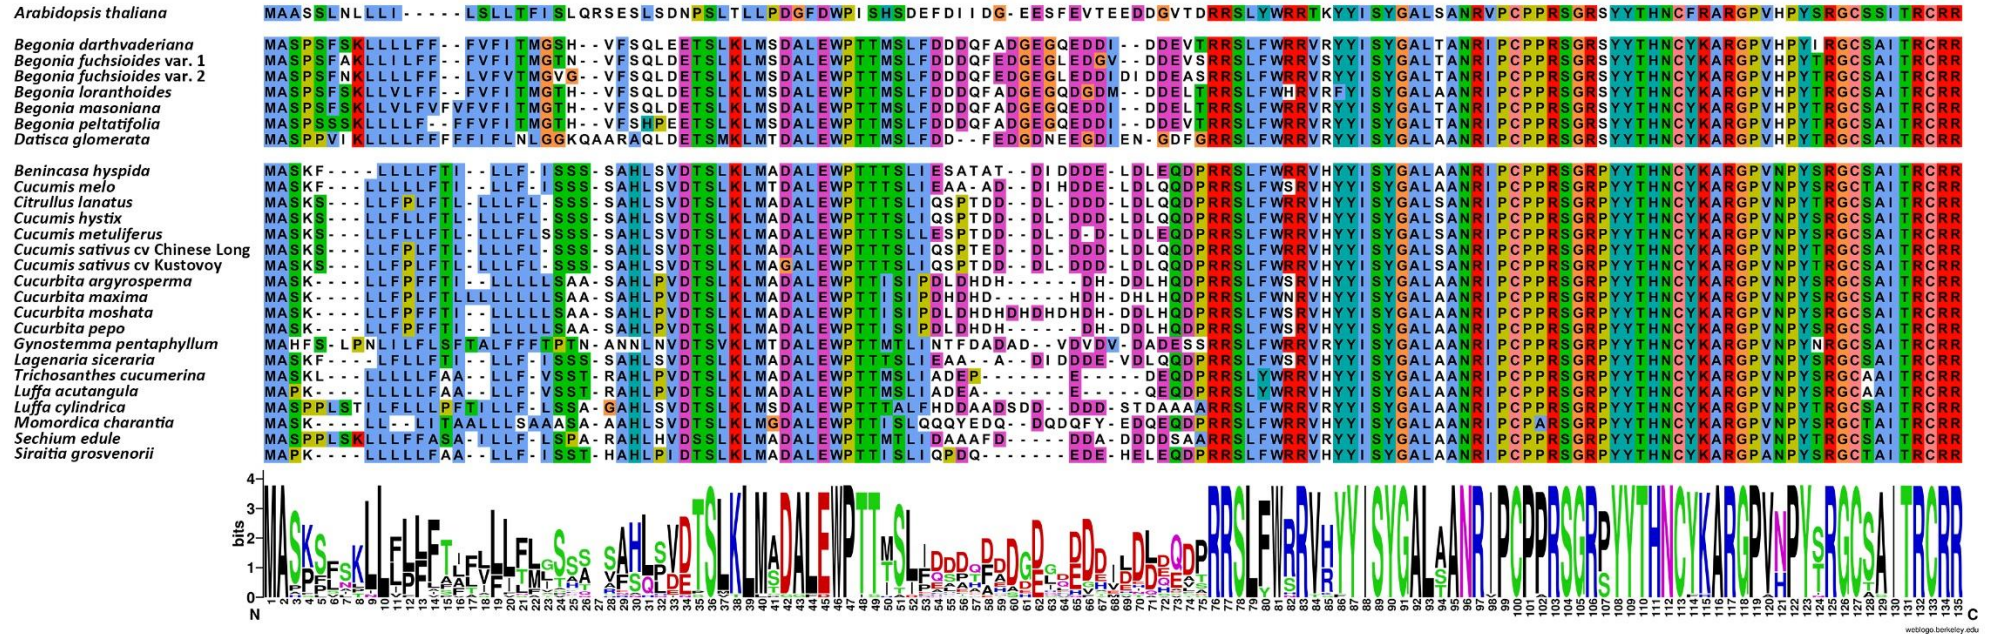

**Figure S1.** Alignment and sequence logo of RALF34 protein precursors within the Cucurbitales order compared with *Arabidopsis*. The RRSL subtilase cleavage site (red bold text) and the RALF34 mature peptide sequence (black bold text) are designated above the alignment. Size of letters in the sequence logo below the alignment is directly proportional to the amino acid similarity of the analyzed RALF34 proteins.

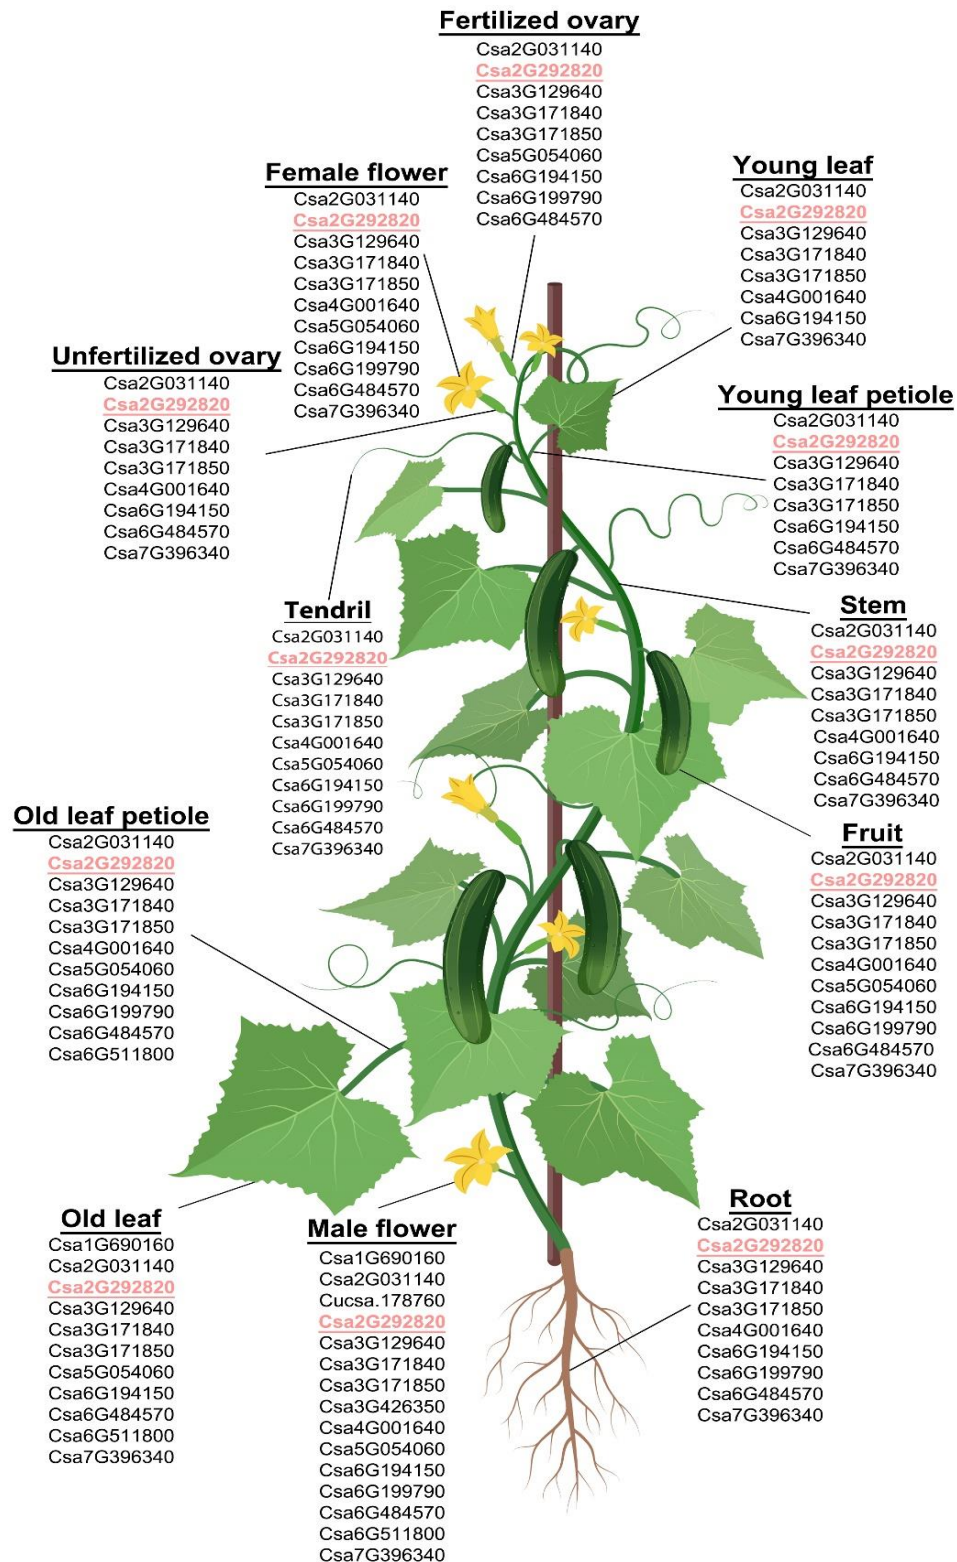

**Figure S2.** Expression of the *CsRALF* genes in different cucumber organs according to the Cucurbit Expression Atlas data (Cucurbit Genomics Database v1). *CsRALF34* gene (ID Csa2G292820) highlighted in light red is expressed in root, stem, old and young leaves including petioles, tendrils, male and female flowers, unfertilized and fertilized ovaries and in fruits. Figure was created with BioRender (<https://biorender.com/>).



*pRALFL34::RALF34-mNeonGreen*

*pRALFL34::RALF34-linker-mNeonGreen*

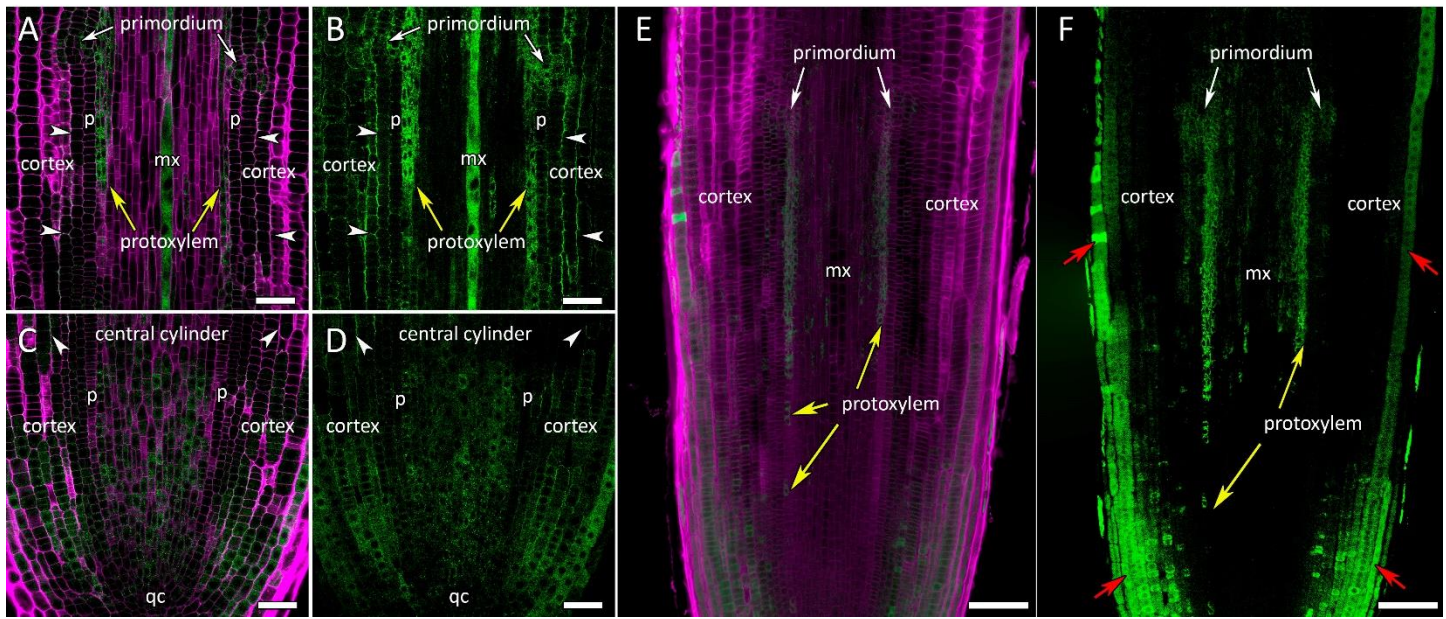

**Figure S3.** Localization of RALF34 fusion protein in *Cucumis sativus* root tips. Confocal laser scanning microscopy of longitudinal vibratome sections. (A–D) Fusion construct without linker (*pCsRALF34::CsRALF34-mNeonGreen*). (A,B) Basal part of the root apical meristem. Localization of CsRALF34 in the xylem and lateral root primordia and accumulation of fusion protein in the apoplast and along the cell walls of root cortex cells (white arrowheads). (C,D) Distal part of the root apical meristem. RALF34 fusion protein was detected only in the cytoplasm of cells. (E,F) Fusion construct with linker (*pCsRALF34::CsRALF34-linker-mNeonGreen*). No accumulation of fusion protein in the apoplast and along the cell walls of root cortex cells can be detected. Note the strong autofluorescence in the root cap cells (red arrows). Green channel – fluorescence of mNeonGreen (and autofluorescence); magenta channel – SR2200-stained cell walls. mx – metaxylem, p – pericycle; qc – quiescent centre. Scale bars: 50  $\mu$ m in (A–D); 100  $\mu$ m in (E,F).

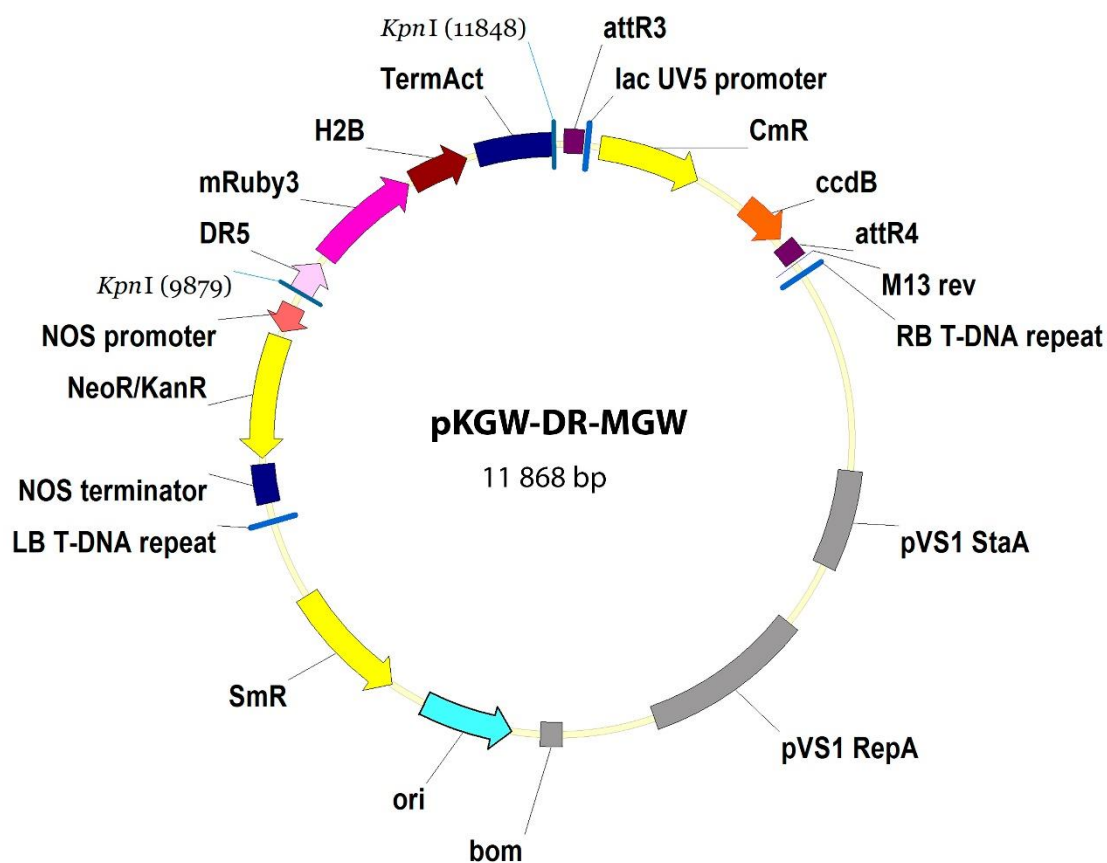

**Figure S4.** Map of the binary vector pKGW-DR-MGW.

**Table S1.** Information about Cucurbitales RALF34 sequences used in alignment for sequence logo building.

See:

**Table S1.** Information about Cucurbitales RALF34 sequences used in alignment for sequence logo building.xlsx

**Table S2.** Construction of binary vectors

| Binary Vector                                     | Destination vector | Promoter in entry vector         | Reporter/insert in entry vector         | Terminator in entry vector |
|---------------------------------------------------|--------------------|----------------------------------|-----------------------------------------|----------------------------|
| pKGW-RR-MGW-pCsRALF34::mNeonGreen-H2B             | pKGW-RR-MGW        | pCsRALF34-pENTRattL4attR1_BSAI   | mNeonGreen-H2B-pUC18-entry8             | pENTRattR2attL3-TermAct    |
| pKGW-RR-MGW-pCsRALF34::CsRALF34-linker-mNeonGreen | pKGW-RR-MGW        | pCsRALF34-pENTRattL4attR1_BSAI   | CsRALF34-linker-mNeonGreen-pUC18-entry8 | pENTRattR2attL3-TermAct    |
| pKGW-RR-MGW-pCsRALF34::CsRALF34-mNeonGreen        | pKGW-RR-MGW        | pCsRALF34-pENTRattL4attR1_BSAI   | CsRALF34-mNeonGreen-pUC18-entry8        | pENTRattR2attL3-TermAct    |
| pKGW-DR-MGW-pCsRALF34::CsRALF34-mNeonGreen        | pKGW-DR-MGW        | pCsRALF34-pENTRattL4attR1_BSAI   | CsRALF34-linker-mNeonGreen-pUC18-entry8 | pENTRattR2attL3-T35S       |
| pKGW-RR-MGW-pCsTHESEUS1::mNeonGreen-H2B           | pKGW-RR-MGW        | pCsTHESEUS1-pENTRattL4attR1_BSAI | mNeonGreen-H2B-pUC18-entry8             | pENTRattR2attL3-TermAct    |
| pKGW-RR-MGW-DR5::mRuby3-H2B                       | pKGW-RR-MGW        | DR5-pENTRattL4attR1              | mRuby3-H2B                              | pENTRattR2attL3-TermAct    |

**Table S3.** Construction of entry and intermediate vectors

| Name of insert                          | Template                                                | Source of template      | Name of vector used/application | Source of vector used              | Resulting entry/intermediate vector       |
|-----------------------------------------|---------------------------------------------------------|-------------------------|---------------------------------|------------------------------------|-------------------------------------------|
| DR5                                     | DR5-pJET1.2                                             | [1]                     | pDONR P4-P1R                    | Thermo Fisher Scientific           | DR5-pENTRattL4attR1                       |
| mRuby3-H2B                              | Addgene plasmid #74258                                  | a gift from Michael Lin | pUC18-entry8                    | [2]                                | mRuby3-H2B - pUC18-entry8                 |
| pCsRALF34                               | cucumber genomic DNA                                    | current study           | pENTRattL4attR1_BSAI            | Wageningen University, Netherlands | pCsRALF34-pENTRattL4attR1_BSAI            |
| CsTHESEUS1 (promoter and coding region) | cucumber genomic DNA                                    | current study           | pJET1.2                         | Thermo Fisher Scientific           | CsTHESEUS1-pJET1.2                        |
| pCsTHESEUS1                             | CsTHESEUS1-pJET1.2                                      | current study           | pENTRattL4attR1_BSAI            | Wageningen University, Netherlands | pCsTHESEUS1-pENTRattL4attR1_BSAI          |
| CsRALF34 (coding sequence)              | cucumber genomic DNA                                    | current study           | pJET1.2                         | Thermo Fisher Scientific           | CsRALF34-pJET1.2                          |
| CsRALF34-linker-mNeonGreen              | CsRALF34-pJET1.2/ Allele Biotechnology plasmid #H2B-213 | current study/[3]       | pUC18-entry8                    | [2]                                | CsRALF34-linker-mNeonGreen - pUC18-entry8 |

|                                 |                                                                   |                      |              |     |                                           |
|---------------------------------|-------------------------------------------------------------------|----------------------|--------------|-----|-------------------------------------------|
| <b>CsRALF34-<br/>mNeonGreen</b> | CsRALF34-<br>pJET1.2/ Allele<br>Biotechnology<br>plasmid #H2B-213 | current<br>study/[3] | pUC18-entry8 | [2] | CsRALF34-<br>mNeonGreen -<br>pUC18-entry8 |
|---------------------------------|-------------------------------------------------------------------|----------------------|--------------|-----|-------------------------------------------|

**Table S4.** List of primers used for amplification of promoters/coding regions in this study

| Name                         | Restriction enzyme/<br>att site | Sequence 5'-3'                                                                           |
|------------------------------|---------------------------------|------------------------------------------------------------------------------------------|
| DR5_FOR5                     | attB4                           | GGGG <b><u>ACAAC</u></b> TTTGTATAGAAA <b><u>AGTTG</u></b> GGGTATCGCAGCCC<br>CCTTTTGTCTCC |
| DR5_REV3                     | attB1r                          | GGGG <b><u>ACTGCTTTTTTGTACAACTTG</u></b> TGTTGTTTGTGT<br>TTGTTGTTGTTGGTAATTGTTG          |
| DR5_FOR4                     | <i>KpnI</i>                     | AA <b><u>AGGTACC</u></b> GGGTATCGCAGCCCCCTTTTGTCTCC                                      |
| TermAct_REV                  | <i>KpnI</i>                     | AA <b><u>AGGTACC</u></b> CTCAAGCGAAATGGTGCGATCT                                          |
| T35S_REV                     | <i>KpnI</i>                     | AA <b><u>AGGTACC</u></b> tcactggatttttggttttaggaatt                                      |
| pCsRALF34_FOR                | <i>SmaI</i>                     | A <b><u>CCCGGG</u></b> CAAATTATAGGGATGAGCATTGGTTCCG                                      |
| pCsRALF34_REV                | <i>SmaI</i>                     | A <b><u>CCCGGG</u></b> GGGGTTTAGAGAGAGAGATGAATGTCAC                                      |
| pCsTHESEUS1_FOR              | <i>XhoI</i>                     | AA <b><u>CTCGAG</u></b> AGAAATAGGATGACTTGAACATGAACCTCC                                   |
| pCsTHESEUS1_REV              | <i>KpnI</i>                     | AA <b><u>GGTACC</u></b> AACTCCATTGAAGAACACAAGAATCTAAAC                                   |
| CDS_CsTHESEUS1_REV           | -                               | ACCCGGGA <b><u>ACTCC</u></b> ATTGAAGAACACAAGAATCTAAAC                                    |
| CDS_CsRALF34_FOR             | -                               | TTGAAAACCGACACTAAAAACAAGAA                                                               |
| CDS_CsRALF34_REV             | -                               | ATATAAAATAAGGAAATCCCCAA <b><u>ACTACA</u></b>                                             |
| CDS_CsRALF34_over_FOR        | <i>KpnI</i>                     | AA <b><u>AGGTACC</u></b> ATGGCTTCCAATCCCTCCTCTT                                          |
| CDS_CsRALF34_over_REV        | -                               | CACTCGCTGCCCGCGCATGGTGAGCAAGGGCGAGGAGGA<br>TAACATGGCCTCTCTCC                             |
| CDS_CsRALF34_over_linker_REV | -                               | CACTCGCTGCCCGCGCATCCACCGGTCGCCACCATGGT<br>GAGCAAGGGCGAGGAGG                              |
| mNeonGreen_FOR               | -                               | ATGGTGAGCAAGGGCGAGGA                                                                     |
| mNeonGreen_REV               | <i>NotI</i>                     | AA <b><u>GCGGCCGCT</u></b> TACTTGTACAGCTCGTCCATGCC                                       |
| CDS_CsRALF34_REV1            | <i>NotI</i>                     | AA <b><u>GCGGCCGCT</u></b> CAGCGGCGGCAGCGA                                               |
| mRuby3_FOR                   | <i>BamHI</i>                    | AA <b><u>GATCC</u></b> ATGGTGTCTAAGGGCGAAGAGC                                            |
| H2B_REV                      | <i>NotI</i>                     | AA <b><u>GCGGCCGCT</u></b> TACTTAGCGCTGGTGTACTTGG                                        |

Restriction enzyme/att sites in adaptors are underlined and given in **BOLD** style.



**Table S5.** Combination of primers, used for different cloning steps

| Combination of primers                             | Application                                                                                                                                                                                                                                 |
|----------------------------------------------------|---------------------------------------------------------------------------------------------------------------------------------------------------------------------------------------------------------------------------------------------|
| DR5 FOR5/DR5 REV3                                  | PCR amplification of DR5 product with attB4/attB1r adaptors for subsequent cloning into pDONR P4-P1R by BP-clonase reaction                                                                                                                 |
| mRuby3 FOR/H2B REV                                 | PCR amplification of mRuby3-H2B product for subsequent <i>Bam</i> HI/ <i>Not</i> I cloning into pUC18-entry8                                                                                                                                |
| DR5_FOR4/TermAct REV                               | DR5::mRuby3-H2B-TermAct insert verification by PCR in pKGW-RR-MGW vector                                                                                                                                                                    |
| DR5_FOR4/TermAct REV                               | PCR amplification of DR5::mRuby3-H2B-TermAct cassette for subsequent <i>Kpn</i> I cloning into pKGW-MGW backbone                                                                                                                            |
| DR5_FOR4/TermAct REV                               | DR5::mRuby3-H2B-TermAct insert verification by PCR in pKGW-DR-MGW vector backbone                                                                                                                                                           |
| pCsRALF34 FOR/pCsRALF34 REV                        | PCR amplification of pCsRALF34 promoter using cucumber genomic DNA as a template                                                                                                                                                            |
| pCsRALF34 FOR/ TermAct REV                         | pCsRALF34::mNeonGreen-H2B-TermAct, pCsRALF34::CsRALF34-linker-mNeonGreen-TermAct, pCsRALF34::CsRALF34-mNeonGreen-TermAct insert verification by PCR in pKGW-RR-MGW vector                                                                   |
| pCsTHESEUS1 FOR/CDS CsTHESEUS1 REV                 | PCR amplification of <i>CsTHESEUS1</i> 6000 bp-fragment containing promoter region and coding sequence for subsequent cloning to pJET1.2                                                                                                    |
| pCsTHESEUS1 FOR/ pCsTHESEUS1 REV                   | pCsTHESEUS1 insert verification by PCR in pJET1.2 and pENTRattL4attR1_BSAI                                                                                                                                                                  |
| pCsTHESEUS1 FOR/ pCsTHESEUS1 REV                   | PCR amplification of pCsTHESEUS1 promoter for subsequent <i>Xho</i> I- <i>Kpn</i> I cloning into pENTRattL4attR1_BSAI                                                                                                                       |
| CDS CsRALF34 FOR/ CDS CsRALF34 REV                 | PCR amplification of <i>CsRALF34</i> coding sequence using cucumber genomic DNA as a template for subsequent cloning to pJET1.2                                                                                                             |
| CDS CsRALF34 over FOR/CDS CsRALF34 over linker REV | PCR amplification of <i>CsRALF34</i> coding sequence fused to linker for further usage as a template in overlap extension PCR                                                                                                               |
| CDS CsRALF34 over FOR/CDS CsRALF34 over REV        | PCR amplification of <i>CsRALF34</i> coding sequence (without linker) for further usage as a template in overlap extension PCR                                                                                                              |
| mNeonGreen FOR/ mNeonGreen REV                     | PCR amplification of mNeonGreen coding sequence for further usage as a template in overlap extension PCR                                                                                                                                    |
| CDS CsRALF34 over FOR/ mNeonGreen REV              | Amplification of final PCR product in overlap extension PCR using <i>CsRALF34</i> (with or without linker) and <i>mNeonGreen</i> fragments obtained during previous steps and subsequent <i>Kpn</i> I- <i>Not</i> I cloning to pUC18-entry8 |

**Table S6.** List of RT-qPCR primers used in this study.

| Name           | Sequence 5'-3'                | Amplicon size, bp | Application                                                      |
|----------------|-------------------------------|-------------------|------------------------------------------------------------------|
| CsRALFL34 FOR1 | CGTAGGGAAGGAGTGAAGAGGTGG      | 160               | Expression of <i>CsRALFL34</i> in response to auxin and ethylene |
| CsRALFL34 REV1 | TGGATGAGGGAAGTGGTGGTGG        |                   |                                                                  |
| CsRALFL34 FOR2 | CTCCAATCACACTCTCACTCTCTTCTCCT | 75                | Expression of <i>CsRALFL34</i> in different organs of cucumber   |
| CsRALFL34 REV3 | AGAGGAGGGATTGGAAGCCATTG       |                   |                                                                  |
| CsEF1a FOR     | ATGGGTAAGGAGAAGGTTACATTAACATT | 241               | Reference gene                                                   |
| CsEF1a REV     | CGAACTTCCACAAAGCAATATCAATT    |                   |                                                                  |

## Video S1

See:

Video S1 DR5-mRuby-H2B in *Cucumis sativus*.avi

## Supplementary references

1. Ilina, E.L.; Logachov, A.A.; Laplaze, L.; Demchenko, N.P.; Pawlowski, K.; Demchenko, K.N. Composite *Cucurbita pepo* plants with transgenic roots as a tool to study root development. *Ann. Bot.* **2012**, *110*, 479-489, doi:10.1093/aob/mcs086.
2. Hornung, E.; Krueger, C.; Pernstich, C.; Gipmans, M.; Porzel, A.; Feussner, I. Production of (10E,12Z)-conjugated linoleic acid in yeast and tobacco seeds. *Biochim. Biophys. Acta - Mol. Cell Biol. Lipids* **2005**, *1738*, 105-114, doi:10.1016/j.bbalip.2005.11.004.
3. Shaner, N.C.; Lambert, G.G.; Chammass, A.; Ni, Y.; Cranfill, P.J.; Baird, M.A.; Sell, B.R.; Allen, J.R.; Day, R.N.; Israelsson, M., et al. A bright monomeric green fluorescent protein derived from *Branchiostoma lanceolatum*. *Nat. Methods* **2013**, *10*, 407-409, doi:10.1038/nmeth.2413.
